# Supplementary material
Source: PubMed Central journal article supplement (PMC4073896)
Supplement: suppmat.pdf [file suppmat.pdf]

## 1 SUPPLEMENTAL MATERIALS 1

2  
3 **Biopsy procedure.** Surgeries were performed under aseptic field conditions. Cows were restrained in a  
4 squeeze chute to minimize movement. Cows were sedated using intravenous administration of  
5 xylazine HCl (35 µg/kg BW; Phoenix Pharmaceuticals, St. Joseph, MO). The hair around the tip of the  
6 tail was clipped and the tail was tied to prevent contamination of the surgical site. The biopsy site was  
7 carefully selected to avoid subcutaneous blood vessels as well as the cisternal region. An area of skin  
8 (10 cm<sup>2</sup>) on the rear quarter was clipped closely, and then washed and sterilized with iodine surgical  
9 scrub and 70% ethanol. For local anesthesia, lidocaine HCl (5 mL; Phoenix Pharmaceuticals, St.  
10 Joseph, MO) was administered subcutaneously. The biopsy site was then washed an additional 3X as  
11 described above. After washing, a 5-cm incision was made through the skin and underlying fascia to  
12 the point where the mammary gland capsule was visible. The biopsy trocar was attached to a high-  
13 speed (16 Volts) cordless drill. The trocar consisted of a stainless steel cannula of 90 mm in length  
14 with a 6-mm diameter containing a retractable blade at the cutting edge of the cannula to sever the core  
15 of the tissue once it was cut. Tissue (≥ 0.5 g) was blotted with sterile gauze to remove any visible milk  
16 secretions and any visible connective tissue was removed. Mammary tissue was then frozen  
17 immediately in liquid nitrogen and stored until isolation of RNA. Once the tissue was collected,  
18 pressure was applied to the incision area until the cessation of bleeding. The skin incision was closed  
19 with Michel wound clips (11 mm; Down Surgical, Mississauga, ON, Canada) and a coating of Prodine  
20 (Phoenix Pharmaceutical, Inc., St. Joseph, MO) iodine ointment was applied to the surgical site.  
21

22 **RNA isolation.** Total RNA was isolated from mammary tissue using TRIzol<sup>®</sup> Reagent (Invitrogen,  
23 Carlsbad, CA). Mammary tissue was homogenized in TRIzol with 1 µL linear acrylamide (Ambion,  
24 Inc., Austin, TX) using a Tissue-Tearor<sup>™</sup> (BioSpec Products, Inc.) homogenizer at maximum speed.  
25 Upon centrifugation, total RNA was separated with chloroform followed by acid phenol:chloroform  
26 (Ambion, Inc., Austin, TX) to remove DNA. Total RNA was then precipitated with isopropanol and  
27 the RNA pellet was cleaned with 75% ethanol prior to reconstitution in RNA storage buffer (Ambion,  
28 Inc., Austin, TX) and storage at -80 °C. Total RNA was cleaned using RNeasy mini kit columns and  
29 residual DNA removed using the RNase-Free DNase Set (Qiagen, Valencia, CA) prior to microarray or  
30 qPCR. RNA quality was assessed using a 2100 Bioanalyzer (Agilent Technologies). Purity of RNA  
31 were assessed by ration of optical density OD<sub>260nm</sub> (oligonucleotides absorbance) /OD<sub>280nm</sub> (protein  
32 absorbance) using NanoDrop ND-1000 (NanoDrop Technologies, Rockland, DE). The ratio of the  
33 sample was > 1.7.  
34

35 **Microarray analysis.** We used a bovine oligoarray with >13,000 annotated genes that was previously  
36 described (2; 3). This platform is publicly accessible in the National Center for Biotechnology  
37 Information (NCBI) Gene Expression Omnibus (GEO) database (GPL8776). Arrays were run in a dye-  
38 swap reference design. The reference was made by pooling RNA from several bovine tissues. The  
39 cDNA was obtained by RT-PCR in a 30 µL reaction adding 10 to 15 µg RNA, 2 µl of random hexamer  
40 primers (3 mg/ml; Invitrogen Corp., CA) and 1 µg oligo dT18 (Operon Biotechnologies, AL), and  
41 DNase-RNase free water to a volume of 17.78 µL. The mixture was incubated at 65°C for 5 min and  
42 kept on ice for 3 min. In the mixture were added 12.2 µL solution composed of 6 µL 5X First-Strand  
43 Buffer, 3 µL 0.1 M DTT, 0.6 µL 100 mM dNTP mix (Invitrogen Corp., CA), 0.12 µL of 50 mM 5-(3-  
44 aminoallyl)-dUTP (Ambion, CA), 2 µL (100 U) of SuperScript<sup>™</sup> III RT (Invitrogen Corp., CA), and

45 0.5  $\mu$ L of RNase Inhibitor (Promega, WI). The reaction was performed at 23°C for 1 min and 46°C for  
46 9 h. The cDNA obtained was then treated with 10  $\mu$ l 1M NaOH, and incubate for 15 min at 65°C to  
47 remove residual RNA. Solution was neutralized by adding 10  $\mu$ l 1M HCl. The unincorporated 5-(3-  
48 aminoallyl)-dUTP and free amines were removed using Qiagen PCR Purification Kit (Qiagen,  
49 Germany). Clean cDNA was dry and resuspended in 4.5  $\mu$ L 0.1 M Na<sub>2</sub>CO<sub>3</sub> buffer (pH 9.0) and 4.5  $\mu$ L  
50 of Amersham CyDye™ fluorescent dyes diluted in 60  $\mu$ l of DMSO (Cy3 or Cy5; GE Healthcare,  
51 USA). Binding of Cy dyes with 5-(3-aminoallyl)-dUTP incorporate in cDNA was obtained by  
52 incubation at room temperature for 1h. The unbound dyes were removed using Qiagen PCR  
53 Purification Kit (Qiagen, Germany) and clean labelled cDNA was measured by mean of NanoDrop  
54 ND-1000 spectrophotometer ([www.nanodrop.com](http://www.nanodrop.com)). Critical for accurate microarray analysis is a  
55 correct competition between sample and reference which require adding in the slide the same amount  
56 of the two labeled cDNA. For this, prior hybridization, an equivalent amount of reference and sample  
57 were calculated and placed in two separate 1.5 mL microfuge tubes and vacuum-dried in dark.  
58

59 ***Microarray hybridization and image acquisition.*** Prior hybridization slides were re-hydrated, treated  
60 at the UV cross linker, washed with 0.2% SDS solution, deeply rinsed with purified water to remove all  
61 not-bound oligos, and pre-hybridized using a solution containing 1% albumin, 5  $\times$  SSC, and 0.1% SDS  
62 at 42 C° for  $\geq$ 45 min with the purpose to decrease background. After pre-hybridization slides were  
63 rinsed with abundant purified water and immersed in isopropanol for  $\sim$ 10s and spin dried. Dried slides  
64 were immediately hybridized according to a dye-swap-reference design (i.e. each sample was labelled  
65 twice using the two dyes and hybridized in each slide with the reference labelled with the opposite  
66 dye). Therefore, a total of 40 slides (i.e. 10 cows  $\times$  2 quarters per cow  $\times$  2 dyes per quarter) were  
67 hybridized to duplicate slides and repeated with reverse labeling for a total of 2 slides per quarter per  
68 cow.  
69

70 Labelled cDNA of the sample was re-hydrated with 80 $\mu$ l of hybridization buffer #1 (Ambion) and  
71 mixed thoroughly. The same solution was transferred in the reference with opposite dye and mixed in  
72 order to obtain a homogenous solution of the two labeled cDNA. Before hybridization into the slide  
73 the labeled cDNA resuspension of the sample + reference was incubated at 90-95°C for ca. 3 min to  
74 allow for cDNA denaturation with the purpose to increase the efficiency of binding with oligos into the  
75 slide.  
76

77 The hybridization was carried out using humidified slide chamber (Corning) with cover slips  
78 (LifterSlip, Thermo Scientific) at 42 C° for about 40 hours in dark. After hybridization the slides were  
79 removed from the chamber and washed by 5 min agitation for 3 times in temporal order: 1 $\times$ SSC and  
80 0.2% SDS solution preheated at 42°C, 0.1 $\times$ SSC and 0.2% SDS, solution, and 0.1 $\times$ SSC solution.  
81 Finally, slides were spin dried and inserted in a 50 mL tubes where Argon gas was added to preserve dye  
82 from degradation. Arrays were scanned with a ScanArray 4000 (GSI-Lumonics, Billerica, MA) dual-  
83 laser confocal scanner and images were processed and edited using GenePix 6.0 (Axon Instruments).  
84 Array quality was assessed using homemade parser software written in Perl language as previously  
85 described (1). Spots in the slide were considered good if the median intensity was  $\geq$ 3 $\times$ standard  
86 deviation above median background for each channel (i.e., dye). Spots were flagged present when both  
87 dyes passed the criteria, marginal if only one dye passed the criteria, absent when both dyes failed to  
88 pass the criteria. In the analysis both present and marginal spots were used.

89

90 **Primer design and testing for qPCR.** Primers were designed as previously described (1). Briefly,  
91 Primer Express software version 3.0 (Applied Biosystems, Foster City, CA) was used with defaults  
92 features except min amplicon length to 100. Primers were aligned using publicly available databases  
93 including BLASTN at NCBI and UCSC's Cow (*Bos taurus*) Genome Browser Gateway  
94 (<http://genome.ucsc.edu/cgi-gin/ghGateway>). Primers were first tested using the SYBR Green protocol  
95 as describe below without the dissociation protocol. Five  $\mu\text{L}$  of the PCR products were run on a 2%  
96 agarose gel (Invitrogen, Carlsbad, CA) stained with ethidium bromide to assess presence of the product  
97 to a expected size and presence of primer-dimer, the rest was purified using Qiaquick PCR purification  
98 kit (Qiagen, Valencia, CA) and sent to Core DNA Sequencing Facility of the Roy J. Carver  
99 Biotechnology Center at the University of Illinois, Urbana, for sequencing. **Supplemental Table 1**  
100 located in **Supplemental Materials 2** shows the list of all primers designed and used for qPCR  
101 analysis in this study. All sequences were confirmed using NCBI and UCSC's cow Genome Browser  
102 Gateway and are shown in **Supplemental Tables 2 and 3** located in **Supplemental Materials 2**.

103

104 **Identification of internal control genes.** Detailed description for the selection criteria of ICG for qPCR  
105 analysis was previously described (4; 5). Briefly, GeneSpring GX software (Agilent Technologies,  
106 Santa Clara, CA) was used to identify mammary tissue gene expression stability among all samples,  
107 i.e., INF (YES and NO) and TRT (NEB and PEB). Genes with a constant normalized expression ratio  
108 ( $\sim 1.0$ ; sample/reference) and with the greatest abundance on microarrays (i.e., 20 out of 20 arrays, 10  
109 cows  $\times$  2 quarters, and  $>100$  relative fluorescence unit) were further used for ICG co-regulation  
110 evaluation using Ingenuity Pathway Analysis® software (**IPA**; Redwood City, CA). Co-regulation is  
111 described as common upstream regulatory factors or direct regulation of transcript expression between  
112 gene products. Genes without known co-regulation from the selected genes or transcription factors  
113 were further used for ICG evaluation through geNorm (6). These included *MMRN2*, *DNASE1*, *NENF*,  
114 and *GRHL1*. geNorm determines both the optimal number of ICG to obtain a reliable normalization  
115 factor (**NF**) and calculates the NF. The optimal number of ICG were determined by assessment of the  
116 pairwise variation  $V$  ( $V_{n/n+1}$ ) between the normalization factors  $NF_n$  and  $NF_{n+1}$ . Due to the very high  
117 stability of NF using 3 genes ( $V = 0.008$ ) *DNASE1*, *NENF*, and *GRHL1* were used for calculation of  
118 NF. The  $V$  of NF using those 3 genes ( $V = 0.008$ ) proved to be even more stable than those used  
119 initially ( $V = 0.094$ ).

120

121 **qPCR.** For cDNA synthesis, 100 ng of purified (described above) RNA sample was added with 1  $\mu\text{g}$   
122 dT18 (Operon Biotechnologies Inc., Germantown, MD), 1  $\mu\text{L}$  10 mM dNTP mix (Invitrogen, Carlsbad,  
123 CA), 1  $\mu\text{L}$  Random Primers (Invitrogen, Carlsbad, CA), and 7  $\mu\text{L}$  DNase/RNase free water. The  
124 mixture was incubated for 5 min at 65°C using an Eppendorf Mastercycler Gradient and then placed on  
125 ice for 3 min. A total of 9  $\mu\text{L}$  of Master Mix consisting of 4.0  $\mu\text{L}$  5X First-Strand Buffer (Invitrogen,  
126 Carlsbad, CA), 1  $\mu\text{L}$  0.1 M DTT, 0.25  $\mu\text{L}$  of SuperScript™ III reverse transcription (Invitrogen,  
127 Carlsbad, CA), 0.25  $\mu\text{L}$  of RNase Inhibitor (Promega, Madison, WI) and 3.5  $\mu\text{L}$  of DNase/RNase free  
128 water was then added. The mixture was incubated for 5 min at 25°C followed by 60 min at 50°C and  
129 then for 15 min at 70°C. The cDNA was then diluted 1:4 with DNase/RNase free water. A  
130 combination of 4  $\mu\text{L}$  of diluted cDNA with 6  $\mu\text{L}$  of 1 $\times$  SYBR Green master mix (Applied Biosystems,  
131 Foster City, CA), 0.4  $\mu\text{L}$  each of 10  $\mu\text{M}$  forward and reverse primers, and 0.2  $\mu\text{L}$  of DNase/RNase free  
132 water were added to each well of a MicroAmp Optical 384-Well Reaction Plate (Applied Biosystems).  
133 All sample reactions and a 6-point standard curve were run in triplicate. The reactions were performed

134 in an ABI Prism 7900 HT SDS instrument (Applied Biosystems) under the following conditions: 2 min  
135 at 50°C, 10 min at 95°C, 40 cycles of 15 s at 95°C, and 1 min at 60°C. During the last cycle (95°C for  
136 15 s, 65°C for 15 s), a dissociation protocol was used to specify the amplicons, the presence of a single  
137 PCR product. The standard curve was generated by pooling cDNA from all 20 experimental samples  
138 (i.e., 10 cows with 2 rear quarter samples each). A 6-point standard curve was generated via serial  
139 dilution of the pooled standard using DNase/RNase free water to obtain a 1:5 (v:v) or 20% dilution per  
140 point. **Supplemental Table 4** in **Supplemental Materials 2** shows the slope and coefficient of  
141 determination of the standard curve, efficiency, and median cycle threshold (Ct) of the measured  
142 transcripts from qPCR SDS documents generated from the ABI Prism 7900 HT SDS instrument.  
143  
144  
145

#### 146 Reference List

- 148 1. **Bionaz M and Loor JJ.** Identification of reference genes for quantitative real-time PCR in the  
149 bovine mammary gland during the lactation cycle. *Physiol Genomics* 29: 312-319, 2007.
  
- 150 2. **Everts RE, Chavatte-Palmer P, Razzak A, Hue I, Green CA, Oliveira R, Vignon X,**  
151 **Rodriguez-Zas SL, Tian XC, Yang X, Renard JP and Lewin HA.** Aberrant gene expression  
152 patterns in placentomes are associated with phenotypically normal and abnormal cattle cloned by  
153 somatic cell nuclear transfer. *Physiol Genomics* 33: 65-77, 2008.
  
- 154 3. **Loor JJ, Everts RE, Bionaz M, Dann HM, Morin DE, Oliveira R, Rodriguez-Zas SL,**  
155 **Drackley JK and Lewin HA.** Nutrition-induced ketosis alters metabolic and signaling gene  
156 networks in liver of periparturient dairy cows. *Physiol Genomics* 32: 105-116, 2007.
  
- 157 4. **Moyes KM, Drackley JK, Morin DE, Bionaz M, Rodriguez-Zas SL, Everts RE, Lewin HA**  
158 **and Loor JJ.** Gene network and pathway analysis of bovine mammary tissue challenged with  
159 *Streptococcus uberis* reveals induction of cell proliferation and inhibition of PPAR $\gamma$  signaling as

160 potential mechanisms for the negative relationships between immune response and lipid  
161 metabolism. *BMC Genomics* In Press, 2009.

162 5. **Piantoni P, Bionaz M, Graugnard DE, Daniels KM, Akers RM and Loor JJ.** Gene  
163 expression ratio stability evaluation in prepubertal bovine mammary tissue from calves fed  
164 different milk replacers reveals novel internal controls for quantitative polymerase chain reaction.  
165 *J Nutr* 138: 1158-1164, 2008.

166 6. **Vandesompele J, De PK, Pattyn F, Poppe B, Van RN, De PA and Speleman F.** Accurate  
167 normalization of real-time quantitative RT-PCR data by geometric averaging of multiple internal  
168 control genes. *Genome Biol* 3: RESEARCH0034, 2002.

169

170
